# Supplementary material for: Treatment of chronic heart failure in Germany: a retrospective database study
Source: Springer Nature journal article supplement (doi:10.1007/s00392-017-1138-6), 2017-07-26
Supplement: MOESM1 [file 13330270]

## **Electronic supplementary material**

### **Treatment of chronic heart failure in Germany: a retrospective database study**

#### *Clinical Research in Cardiology*

**Stefan Störk • Renate Handrock • Josephine Jacob • Jochen Walker • Frederico Calado • Raquel Lahoz  
Stephan Hupfer • Sven Klebs**

**Corresponding author:**

Professor Stefan Störk

Comprehensive Heart Failure Centre Würzburg and Department of Internal Medicine I, University and  
University Hospital Würzburg, Würzburg, Germany

e-mail address: [Stoerk\\_S@ukw.de](mailto:Stoerk_S@ukw.de)

**Online Resource 1** Cardiovascular medication substance groups included in the analysis

| ATC code | Designation in ATC/DDD Index 2013 (German version)      |
|----------|---------------------------------------------------------|
| C01A     | Cardiac glycosides                                      |
| C01AA04  | Digitoxin                                               |
| C01AA05  | Digoxin                                                 |
| C01E     | Other cardiac preparations                              |
| C01EB17  | Ivabradine                                              |
| C03A     | Low-ceiling diuretics, thiazides                        |
| C03B     | Low-ceiling diuretics, excl. thiazides                  |
| C03C     | High-ceiling diuretics                                  |
| C03D     | Potassium-sparing diuretics                             |
| C03DA01  | Spironolactone                                          |
| C03DA04  | Eplerenone                                              |
| C03E     | Diuretics and potassium-sparing agents, combination     |
| C03EC01  | Spironolactone and low-ceiling diuretics                |
| C03EC21  | Spironolactone and hydrochlorothiazides                 |
| C03EC41  | Spironolactone and bendroflumethiazide                  |
| C03ED01  | Spironolactone and high-ceiling diuretics               |
| C07A     | $\beta$ -blocking agents, plain                         |
| C07AB07  | Bisoprolol                                              |
| C07AB12  | Nebivolol                                               |
| C07AB02  | Metoprolol                                              |
| C07AB52  | Metoprolol, combination                                 |
| C07AG02  | Carvedilol                                              |
| C07B     | $\beta$ -blocking agents and thiazides                  |
| C07BB02  | Metoprolol and thiazides                                |
| C07BB07  | Bisoprolol and thiazides                                |
| C07BB12  | Nebivolol and thiazides                                 |
| C07BG02  | Carvedilol and thiazides                                |
| C07C     | $\beta$ -blocking agents and other diuretics            |
| C07CB02  | Metoprolol and other diuretics                          |
| C07D     | $\beta$ -blocking agents, thiazides and other diuretics |
| C07F     | $\beta$ -blocking agents and other antihypertensives    |
| C07FB02  | Metoprolol and other antihypertensives                  |
| C07FB07  | Bisoprolol and other antihypertensives                  |
| C07FB22  | Metoprolol and nifedipine                               |
| C07FB24  | Metoprolol and felodipine                               |
| C08C     | Calcium-channel blockers                                |
| C08CA01  | Amlodipine                                              |
| C08CA02  | Felodipine                                              |
| C09A     | ACE inhibitors, plain                                   |
| C09AA03  | Lisinopril                                              |
| C09AA05  | Ramipril                                                |
| C09AA02  | Enalapril                                               |
| C09AA01  | Captopril                                               |
| C09B     | ACE inhibitors, combination                             |
| C09BA01  | Captopril and diuretics                                 |
| C09BA05  | Ramipril and diuretics                                  |
| C09BA25  | Ramipril and hydrochlorothiazides                       |
| C09BA02  | Enalapril and diuretics                                 |
| C09BA03  | Lisinopril and diuretics                                |
| C09BB03  | Lisinopril and amlodipine                               |

|         |                                                 |
|---------|-------------------------------------------------|
| C09BB05 | Ramipril and felodipine                         |
| C09C    | Angiotensin II antagonists, plain               |
| C09CA01 | Losartan                                        |
| C09CA03 | Valsartan                                       |
| C09CA06 | Candesartan                                     |
| C09D    | Angiotensin II antagonists, combination         |
| C09DA01 | Losartan and diuretics                          |
| C09DA03 | Valsartan and diuretics                         |
| C09DA06 | Candesartan and diuretics                       |
| C09DB01 | Valsartan and amlodipine                        |
| C09DB06 | Losartan and amlodipine                         |
| C09DX01 | Valsartan, hydrochlorothiazides, and amlodipine |

---

*ACE* angiotensin-converting enzyme, *ATC* Anatomical Therapeutic Chemical, *DDD* defined daily dose
